# Supplementary material for: The sexually dimorphic impact of maltreatment on cortical thickness, surface area and gyrification
Source: Springer Nature journal article supplement (doi:10.1007/s00702-016-1523-8), 2016-02-27
Supplement: MOESM1 [file 702_2016_1523_MOESM1_ESM.pdf]

## Supplemental material: The sexually dimorphic impact of maltreatment on cortical thickness, surface area and gyrification

**Supplemental table S1.1. Global measurements of estimated total intracranial volume, and surface-based measures of cortical structure between the maltreated and non-maltreated groups.**

| <b>By group</b> |                         |           |                    |           |          |
|-----------------|-------------------------|-----------|--------------------|-----------|----------|
|                 | <i>Control (n = 60)</i> |           | <i>MT (n = 62)</i> |           | <i>p</i> |
|                 | <i>Mean</i>             | <i>SD</i> | <i>Mean</i>        | <i>SD</i> |          |
| Estimated ICV   | 1479214.0               | 122189.4  | 1446047.6          | 117034.3  | 0.13     |
| Mean CT         | 2.65                    | 0.09      | 2.65               | 0.10      | 0.86     |
| Mean IGI        | 3.18                    | 0.12      | 3.17               | 0.12      | 0.94     |
| Total SA        | 173694                  | 15367     | 169952             | 13780     | 0.16     |

  

| <b>By sex</b> |                       |           |                         |           |          |
|---------------|-----------------------|-----------|-------------------------|-----------|----------|
|               | <i>Males (n = 37)</i> |           | <i>Females (n = 47)</i> |           | <i>p</i> |
|               | <i>Mean</i>           | <i>SD</i> | <i>Mean</i>             | <i>SD</i> |          |
| Estimated ICV | 1512992.0             | 115087.5  | 1416473.0               | 106273.4  | <0.001   |
| Mean CT       | 2.65                  | 0.10      | 2.65                    | 0.10      | 0.86     |
| Mean IGI      | 3.21                  | 0.11      | 3.15                    | 0.13      | 0.01     |
| Mean SA       | 177477                | 13271     | 166640                  | 13990     | <0.001   |

ICV: Intracranial volume; CT: cortical thickness; IGI: local gyrification index; All values were computed across both hemispheres. All p values derived from t-tests.
